# Supplementary material
Source: publisher figshare collection journal article supplement (https://tandf.figshare.com/articles/dataset/_/11889441)
Supplement: Supplementary file 1 [file 1]

Archive with 3 entries (3 files):
- Supplementary Figures.pdf
- ncer-2019-or-0830-File010.jpg
- ncer-2019-or-0830-File011.jpg
