# Supplementary material
Source: publisher figshare collection journal article supplement (https://tandf.figshare.com/articles/dataset/_/11889441)
Supplement: Supplementary file 1 [file 1 › Supplementary Figures.pdf]

## Supplementary material

Figure S1. The micrographs of wound closure of the *in vitro* wound-healing HCEnC model with time after exposure to 0.5, 1, 2, 4 and 8 J/cm<sup>2</sup> UVA for 2 h. NUVA: without exposure to UVA; 0 to 20h PUVA: at 0-20h post-exposure to UVA for 2 h. Scale bar=50µm.

Figure S2. The micrographs of wound closure with time after exposure to 1 or 2 J/cm<sup>2</sup> UVA following pretreatment with or without 1.5 mM Asc-2p for 2 h. NUVA: without exposure to UVA; 0 to 20h PUVA: at 0-20h post-exposure to UVA for 2 h. Control: without pretreatment with Asc-2p and exposure to UVA; control+1.5 mM Asc-2p: treatment with 1.5 mM Asc-2p for 2 h without exposure to UVA; 1 J/cm<sup>2</sup>: exposure to 1 J/cm<sup>2</sup> for 2 h; 1.5 mM Asc-2p + 1 J/cm<sup>2</sup>: pretreatment with 1.5 mM Asc-2p for 2 h then exposure to 1 J/cm<sup>2</sup> UVA for 2 h; 2 J/cm<sup>2</sup>: exposure to 2 J/cm<sup>2</sup> UVA for 2 h; 1.5 mM Asc-2p+ 2 J/cm<sup>2</sup>: pretreatment with 1.5 mM Asc-2p for 2 h then exposure to 2 J/cm<sup>2</sup> UVA for 2 h. Scale bar=50µm.
