# Supplementary material
Source: publisher figshare collection journal article supplement (https://tandf.figshare.com/articles/dataset/_/11889441)

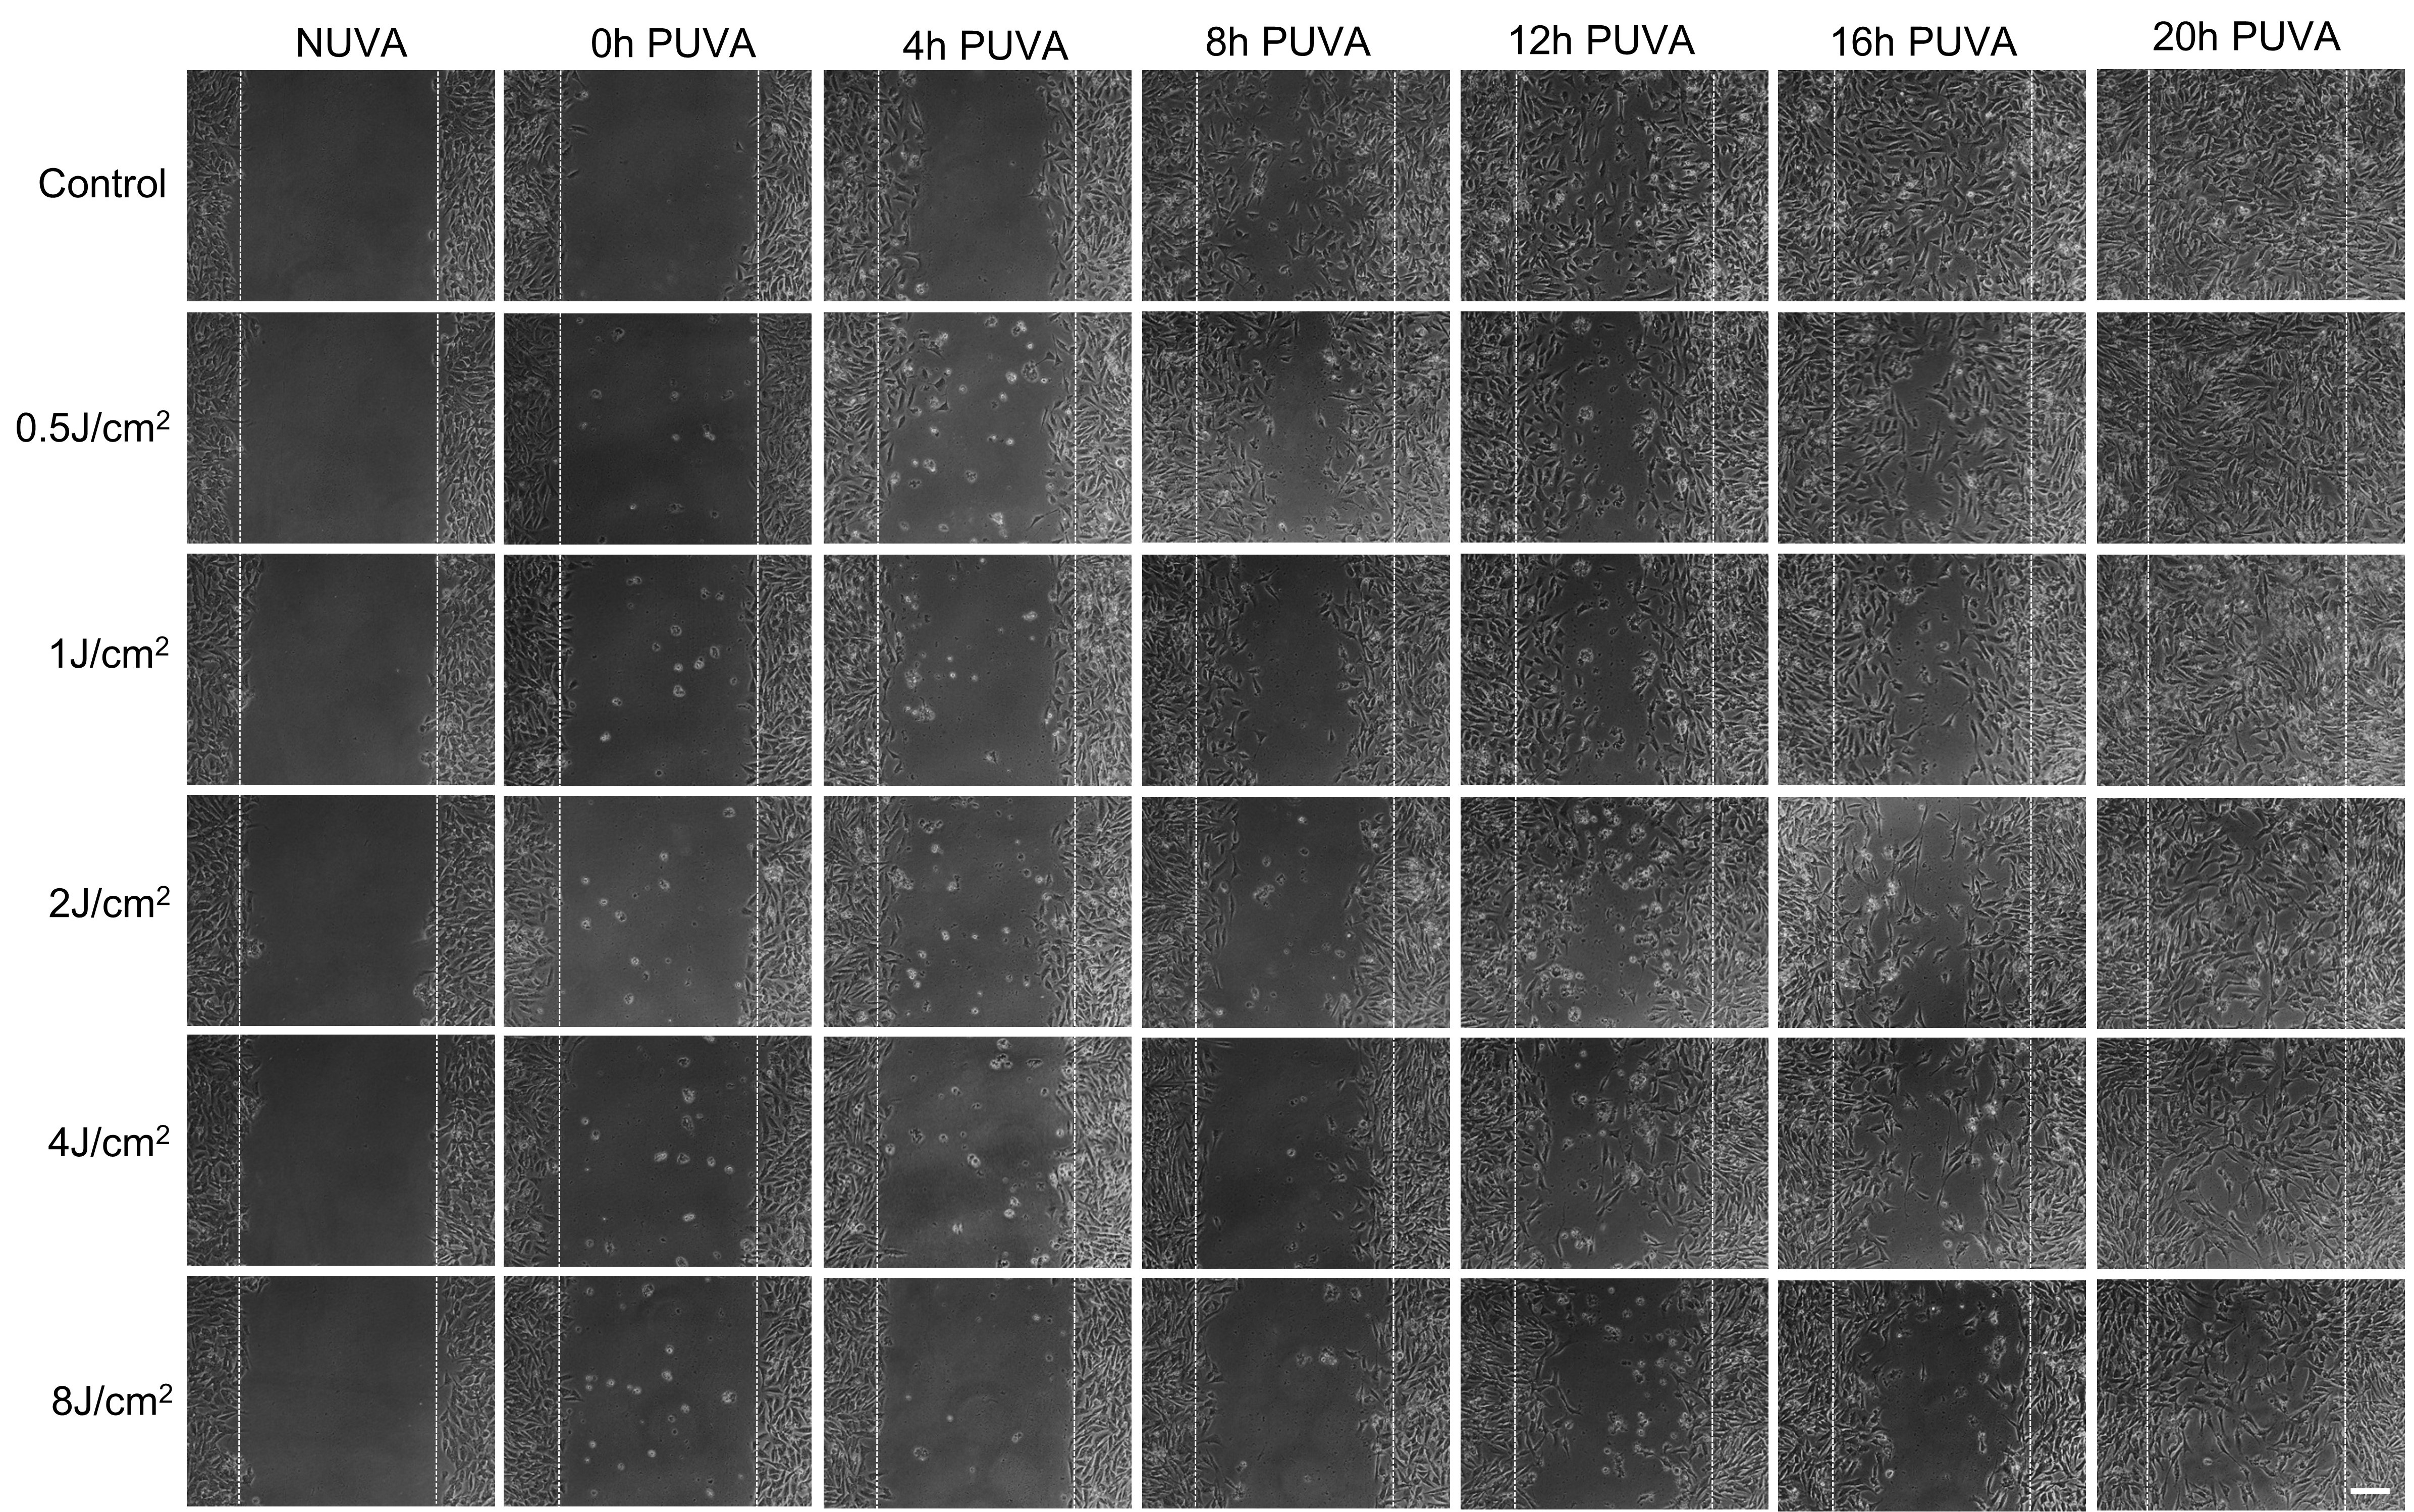

Supplement: Supplementary file 1 [file 1 › ncer-2019-or-0830-File010.jpg]

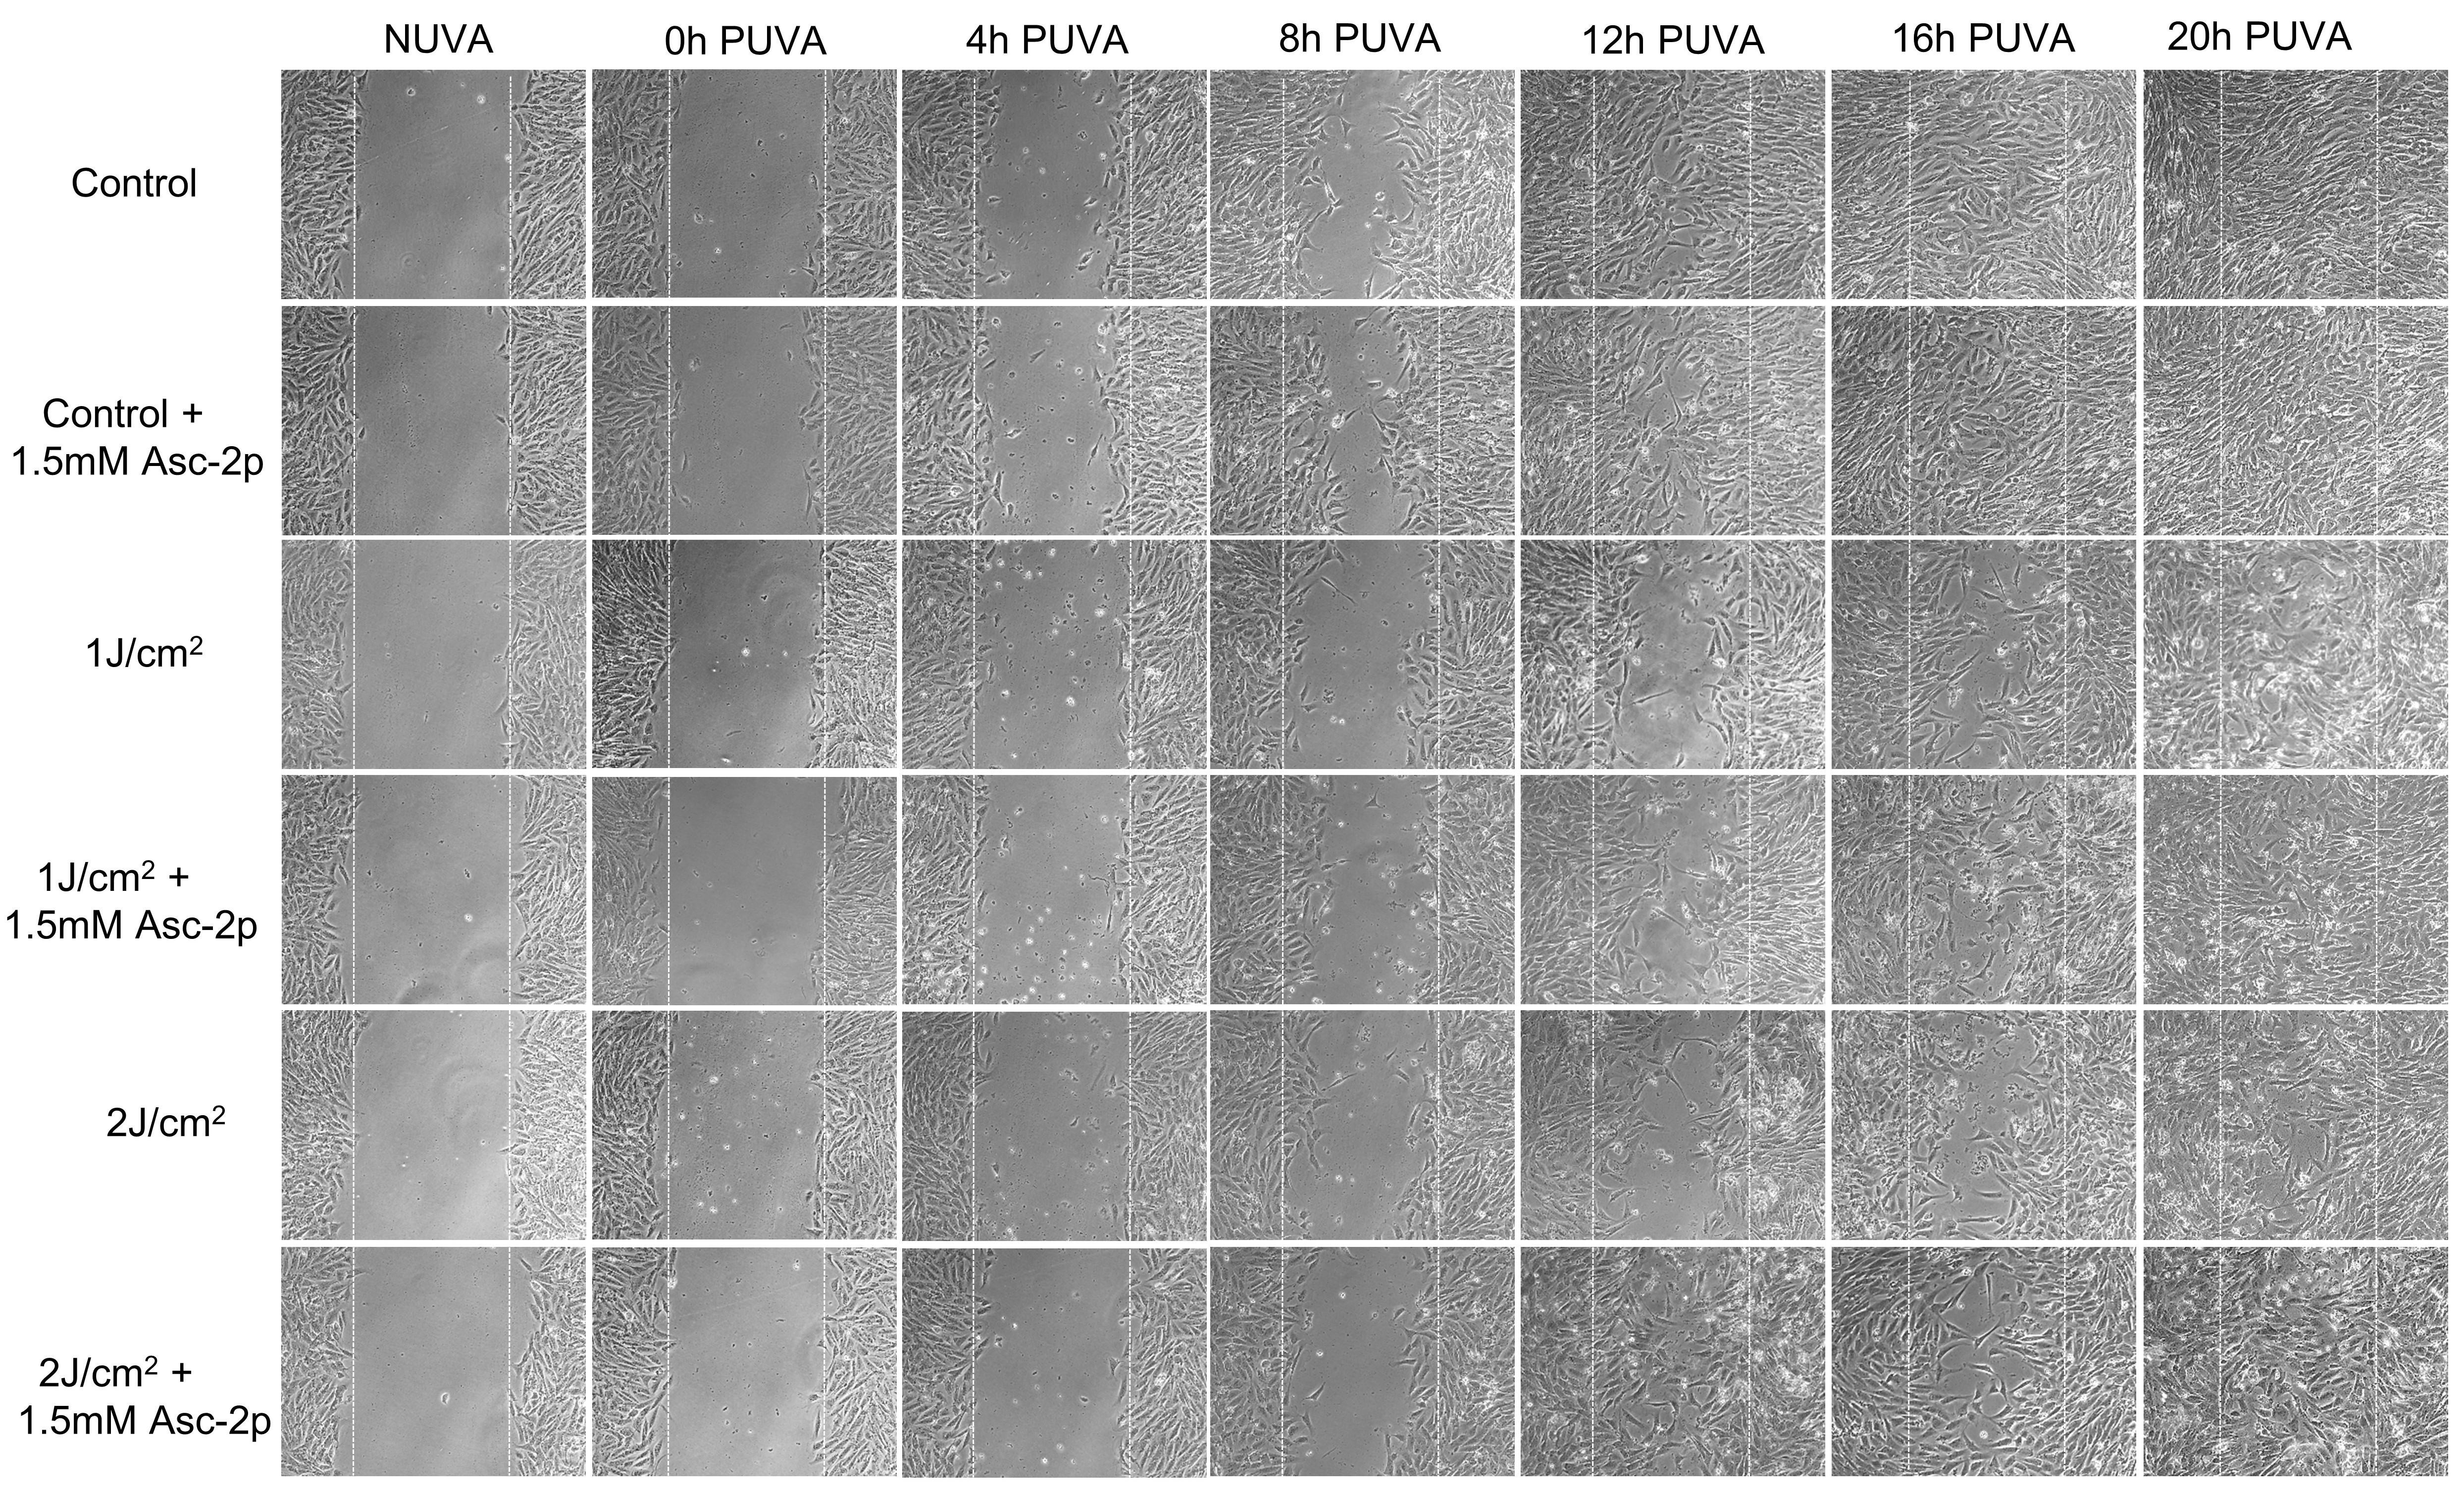

Supplement: Supplementary file 1 [file 1 › ncer-2019-or-0830-File011.jpg]
